# Supplementary material
Source: publisher figshare collection journal article supplement (https://sage.figshare.com/ndownloader/files/16621076)

Online Supplementary Figure 1. Relationships between child food security status and HCC by race groups (N = 31)

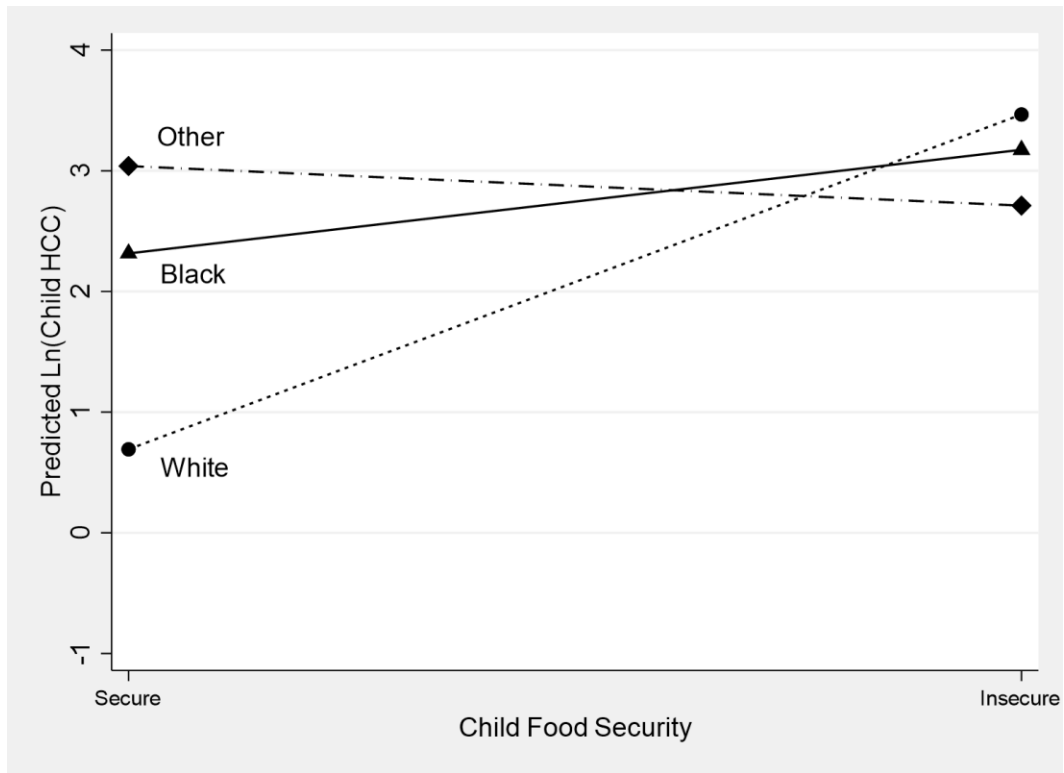

Online Supplementary Figure 2. Relationship between mothers' food security status and HCC stratified by their children's food security status (N = 32)

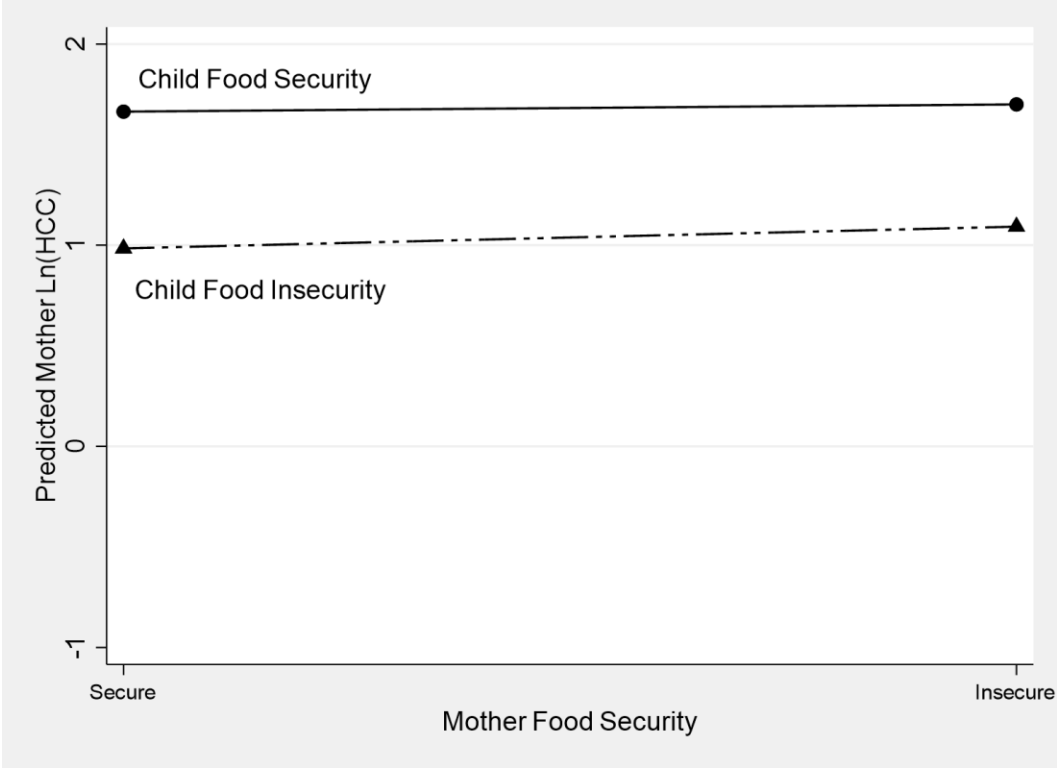

Online Supplementary Figure 3. Relationship between mothers' food security status and perceived distress stratified by their children's food security status (N = 32)

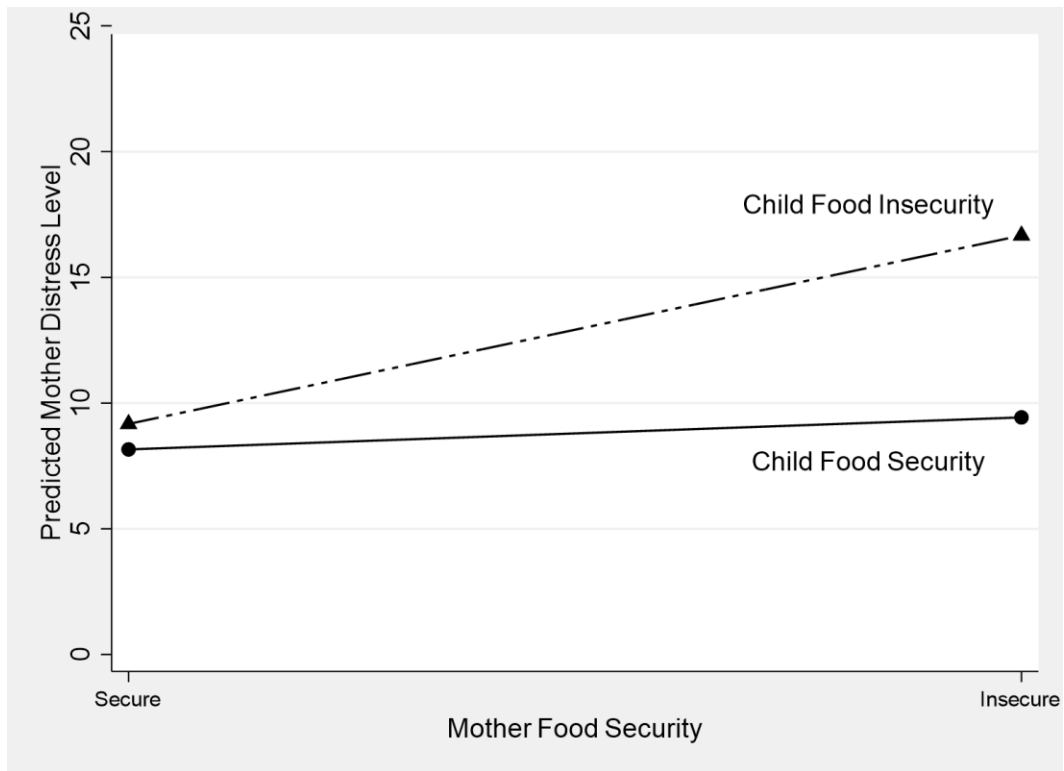

Online Supplementary Figure 4. Relationship between mothers' food security status and perceived coping stratified by their children's food security status (N = 32)

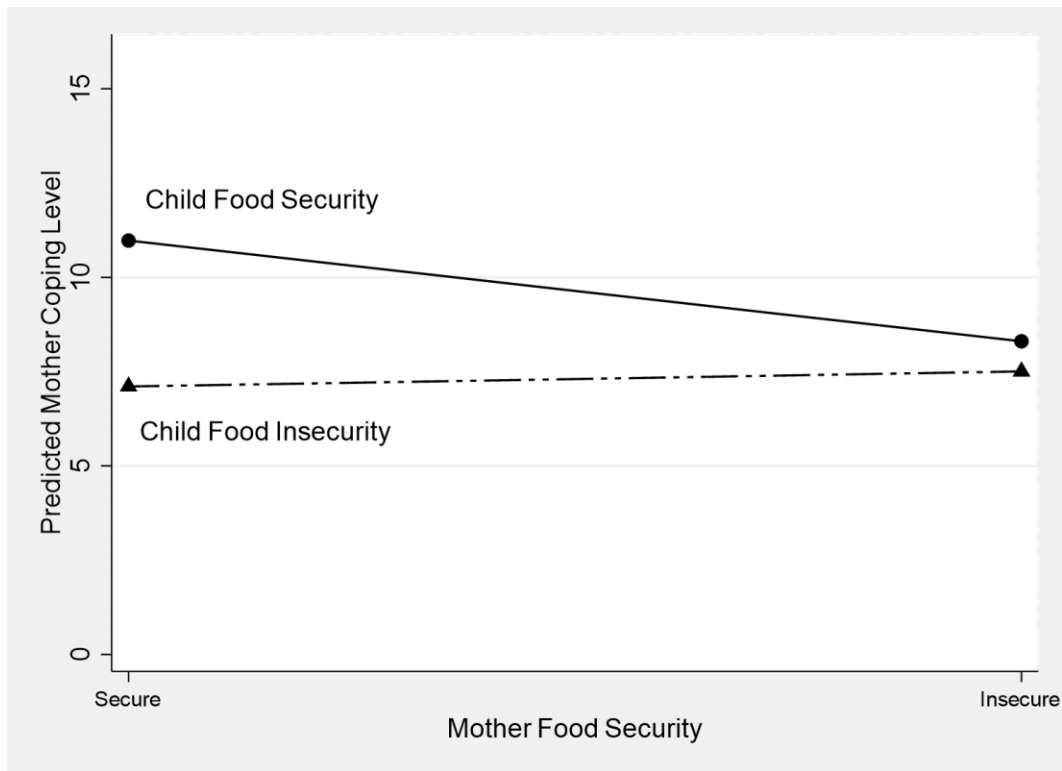

Supplement: Supplementary file 1 [file 16621076]
